# Supplementary material for: Therapeutic substance basis of Bu-Ti-Hua-Tan-Tang for chronic obstructive pulmonary disease: A targeted protein extraction approach
Source: Research Square preprint supplement (doi:10.21203/rs.3.rs-7026355/v1), 2025-07-23
Supplement: Supplementary file 1 [file 32ef83c3b16719afab82ff6d.docx]

Supplementary Material

Therapeutic substance basis of Bu-Ti-Hua-Tan-Tang for chronic obstructive pulmonary disease: A targeted protein extraction approach

Xin Zhaa†, Wen-wei Gonge†, Xue-ying Li6†, Qing Xiaa, Jing-hua Ruana, Zhu-sheng Zhud*, Xiang-chun Shenbc*, Shao-bo Liubc*

aThe First Affiliated Hospital of Guizhou University of Traditional Chinese Medicine, Formulation (R&D) Department, Guiyang, 550001, China.

bThe State Key Laboratory of Functions and Applications of Medicinal Plants, Yunmanhu Campus, Guizhou Medical University, Guian New District, Guiyang 550025, China.

cThe High Efffcacy Application of Natural Medicinal Resources Engineering Center of Guizhou Province, School of pharmacy, Guizhou Medical University, Guiyang 550025, China.

dGuizhou University of Traditional Chinese Medicine, Guiyang, 550001, China.

eThe Third People's Hospital of Guizhou Province,550001, China.

fMudanjiang Normal University, Mudanjiang, 157011, China.

**† These authors have contributed equally to this work.**

*** Co-correspondence authors**

Shao-bo Liu: liushaobo8818@163.com

Xiang-chun Shen: [shenxiangchun@126.com](mailto:shenxiangchun@126.com)

Zhu-sheng Zhu: [27224496@qq.com](mailto:27224496@qq.com)

# Supplementary Figures


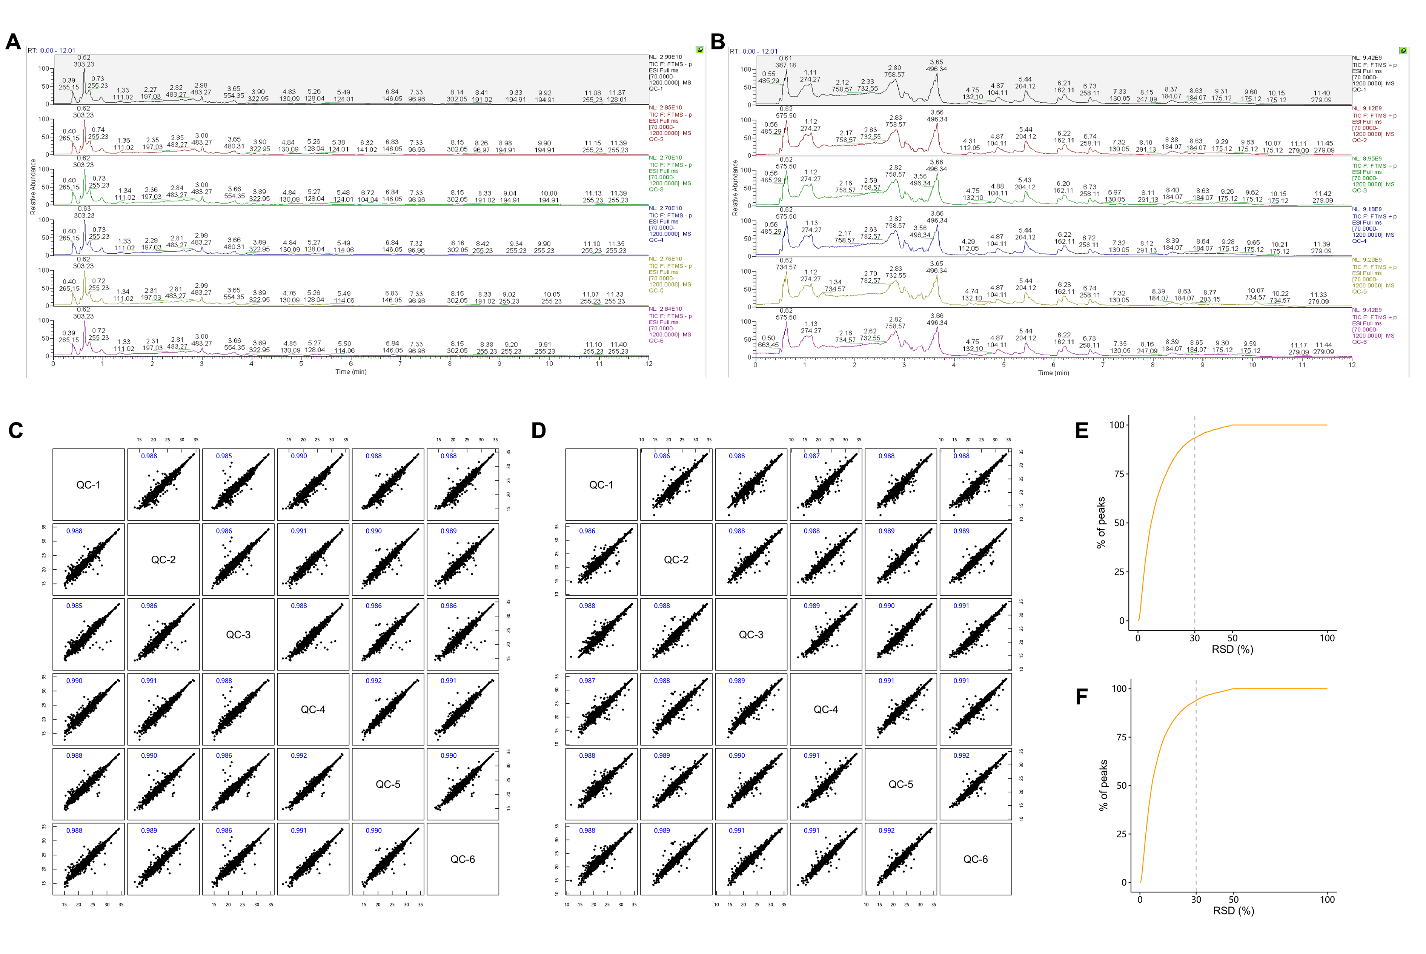


**Figure S1.** Quality control analysis of metabonomics

***Notes***: A and B shows the total ion current (TIC) chromatograms of the QC samples in negative (A) and positive (B) ion mode. C and D shows the correlation analysis of chromatographic peak response intensity (C) and retention time (D). E and F were the detection and analysis of relative standard deviation for chromatographic peaks in QC samples with negative and positive ion mode.


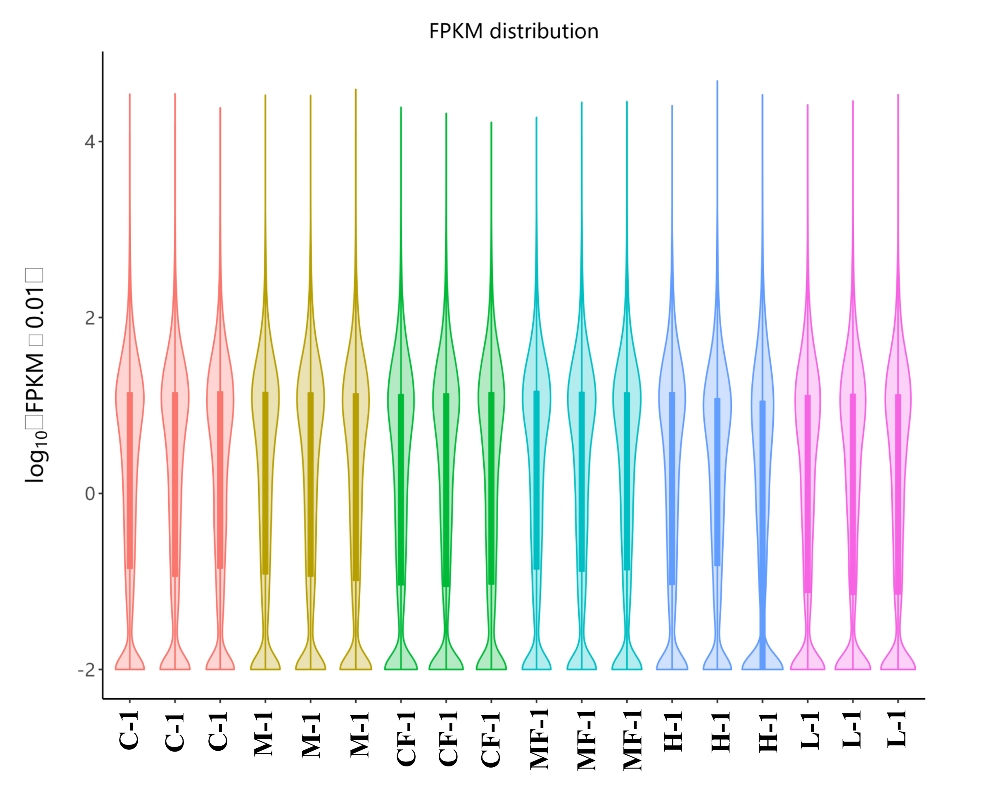


**Figure S2.** The FPKM analysis for gene expression in RNA-seq


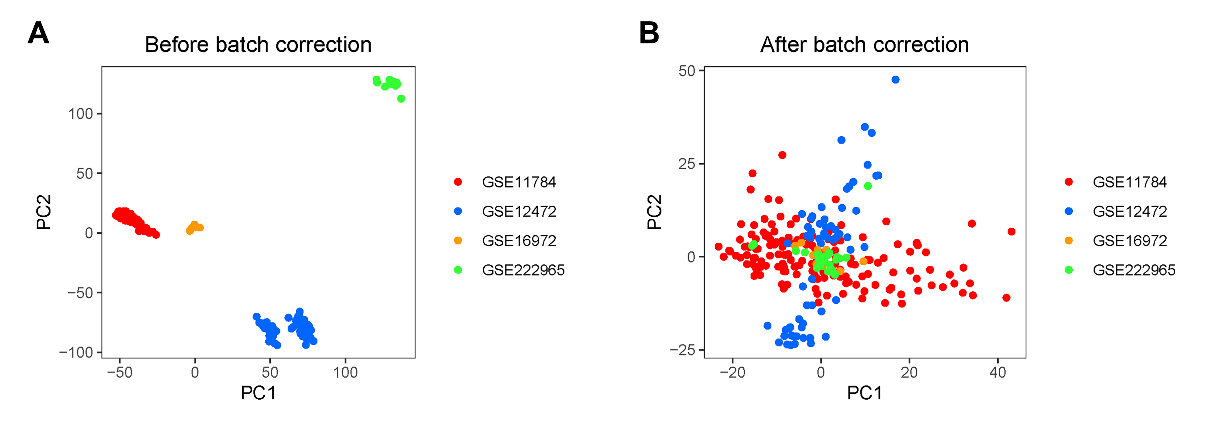


**Figure S3.** The batch effect analysis of transcriptome data for clinical patients based on GEO database

***Notes***: A shows the aggregation status of GEO clinical patient data before batch effect processing. B shows the aggregation status of GEO clinical patient data after batch effect processing.


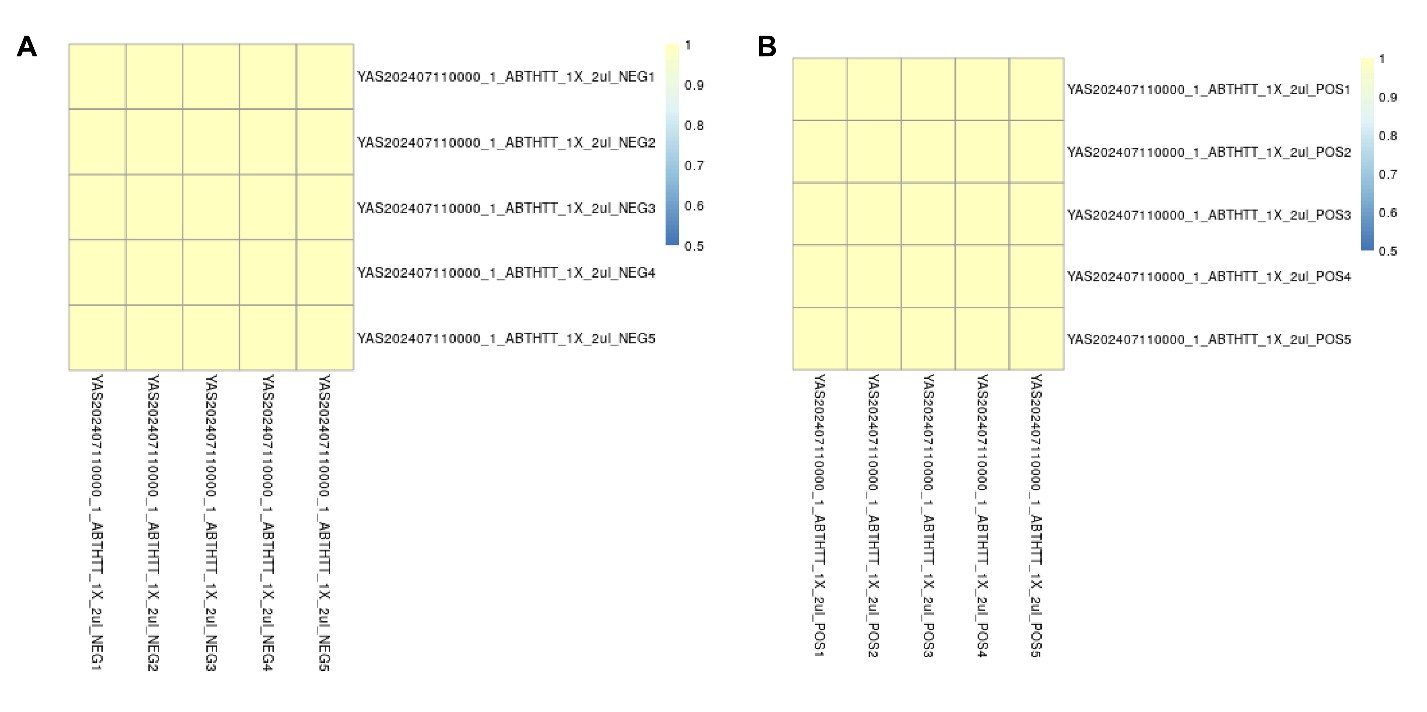


**Figure S4.** The correlation analysis of QC samples for BTHTT

in positive and negative ion mode

# Supplementary Tables

Table S1. Identification and regulatory analysis of metabolic markers in COPD rat models.

| ID | m/z | rt(s) | Name | adduct | score | HMDB | Trend |
| --- | --- | --- | --- | --- | --- | --- | --- |
| M369T570 | 369.24947 | 569.960000 | 3-methoxyprostaglandin f1.alpha. | [M+H-H2O]+ | 0.969617377 | HMDB0286199 | ↓**## |
| M400T199_2 | 400.34192 | 199.303000 | ***L-palmitoylcarnitine*** | [M+H]+ | 0.997720211670096 | HMDB0000222 | ↓** |
| M118T291 | 118.08624 | 290.973000 | Betaine | [M+H]+ | 0.999603511260612 | HMDB0000043 | ↓**## |
| M372T203 | 372.31070 | 202.699000 | Myristoyl-l-carnitine | [M+H]+ | 0.994441382 | HMDB0005066 | ↓* |
| M304T508 | 304.16153 | 508.102000 | Glu-Arg | [M-H]+ | 0.856483469627984 | HMDB0028813 | ↓* |
| M367T503 | 367.13925 | 502.841000 | ***Phosphocholine*** | [2M+H]+ | 0.991192484625143 | HMDB0001565 | ↓**# |
| M263T410 | 263.12384 | 410.275000 | Pro-phe | [M+H]+ | 0.993603495863461 |  | ↓**## |
| M144T377 | 144.10190 | 377.380500 | N.epsilon.-methyl-l-lysine | [M+H-NH3]+ | 0.947458402210469 | HMDB0002038 | — |
| M130T284 | 130.09749 | 284.473000 | L-pipecolic acid | [M+H]+ | 0.950763306387126 | HMDB0000716 | — |
| M308T388 | 308.09885 | 387.767000 | N-acetylneuraminate | [M+H]- | 0.993204253548657 | HMDB0000230 | ↓* |
| M164T65 | 164.09169 | 65.273500 | L-beta-homomethionine | [M+H]+ | 0.785529496978964 | HMDB0030406 | — |
| M138T306 | 138.05497 | 305.662000 | 4-aminobenzoate | [M+H]+ | 0.999518685347717 | HMDB0001392 | ↑* |
| M182T324 | 182.08107 | 323.524000 | Tyrosine | [M+H]+ | 0.913322799013379 | HMDB0000158 | ↓* |
| M247T369 | 247.14004 | 369.468500 | 2-cis-4-trans-abscisic acid | [M+H-H2O]+ | 0.952536637334567 | HMDB0035140 | — |
| M357T563 | 357.24947 | 562.532000 | Pro-Ile-Lys | [M+H]+ | 0.980120256589658 | HMDB0341190 | — |
| M210T57 | 210.00767 | 57.353100 | Phosphocreatine | [M-H]- | 0.909653615 | HMDB0001511 | — |
| M89T243_2 | 89.02433 | 242.834500 | L-(+)-lactic acid | [M-H]- | 0.999842412382022 | HMDB0000190 | ↓**## |
| M133T441 | 133.01426 | 440.970500 | Dl-malic acid | [M-H]- | 0.994463909307595 | HMDB0000744 | — |
| M362T36 | 362.23686 | 36.260600 | N-palmitoyltaurine | [M-H]- | 0.998701744470074 | HMDB0240594 | ↓*# |
| M287T323 | 287.05219 | 323.164000 | Orotidine | [M-H]- | 0.989580586 | HMDB0000788 | ↓* |
| M200T322 | 199.96930 | 321.892000 | Cysteine-s-sulfate | [M-H]- | 0.985742234 | HMDB0000731 | — |
| M164T390 | 164.03864 | 390.405000 | Methionine sulfoxide | [M-H]- | 0.896957495657619 |  | — |
| M339T517 | 338.98879 | 516.992000 | D-fructose 1,6-bisphosphate | [M-H]- | 0.992276629567382 | HMDB0060444 | ↓**## |
| M185T519 | 184.98599 | 519.128500 | 3-Phospho-D-glycerate | [M-H]- | 0.984729047833972 | HMDB0062707 | — |
| M105T330 | 105.01940 | 329.581000 | Glyceric acid | [M-H]- | 0.997881820375674 | HMDB0031818 | ↓* |
| M103T330 | 103.00368 | 330.487000 | 2-keto-d-gluconic acid | [M-H-C3H6O3]- | 0.891549158123288 |  | — |
| M140T489 | 140.01179 | 488.561000 | O-phosphoethanolamine | [M-H]- | 0.998017656 | HMDB0000224 | — |
| M611T509 | 611.14498 | 509.082000 | ***Glutathione, oxidized*** | [M+H]- | 0.966608726453017 | HMDB0003337 | ↓* |
| M377T24 | 377.06988 | 23.515800 | 4.alpha.-mannobiose | [M+Cl]- | 0.807000176886421 | HMDB0286199 | — |

***Notes***: “Trend” specifically refers to the adjustment of metabolic markers by the BTHTT treatment group. Compared with the model group, the high-dose group has significant differences (**p*<0.05, ***p*<0.01), and the low-dose group has significant differences (#*p*<0.05, ##*p*<0.01).

Table S2. Quality analysis of data from rat samples in each group in transcriptomics.

| Sample | Raw_reads | Clean_reads | Clean_bases | Error(%) | Q20(%) | Q30(%) | GC(%) |
| --- | --- | --- | --- | --- | --- | --- | --- |
| C-1 | 57309522 | 57292840 | 8.5G | 0.02 | 98.9 | 96.84 | 49.8 |
| C-2 | 57997846 | 57980652 | 8.57G | 0.02 | 98.99 | 97.09 | 50.84 |
| C-3 | 63844560 | 63824856 | 9.39G | 0.02 | 98.99 | 97.14 | 52.01 |
| M-1 | 62826878 | 62808138 | 9.3G | 0.02 | 99.05 | 97.25 | 51.13 |
| M-2 | 59183480 | 59165712 | 8.78G | 0.02 | 98.97 | 97.06 | 51.21 |
| M-3 | 52552874 | 52536902 | 7.75G | 0.02 | 99.01 | 97.19 | 51.41 |
| CF-1 | 52169782 | 52154148 | 7.71G | 0.02 | 98.99 | 97.11 | 49.92 |
| CF-2 | 42921528 | 42908586 | 6.35G | 0.02 | 98.95 | 97.03 | 50.63 |
| CF-3 | 70931280 | 70909930 | 10.48G | 0.02 | 98.98 | 97.1 | 50.99 |
| H-1 | 62006752 | 61988168 | 9.2G | 0.02 | 98.94 | 96.99 | 51.03 |
| H-2 | 67633506 | 67613534 | 10.02G | 0.02 | 99.04 | 97.23 | 48.77 |
| H-3 | 40119960 | 40108046 | 5.52G | 0.02 | 99.29 | 97.97 | 54.36 |
| L-1 | 55002542 | 54985492 | 8.01G | 0.02 | 99.18 | 97.63 | 52.5 |
| L-2 | 39981568 | 39969154 | 5.84G | 0.02 | 99.16 | 97.59 | 53.47 |
| L-3 | 44549196 | 44535802 | 6.51G | 0.02 | 99.09 | 97.42 | 52.48 |
| MF-1 | 58757144 | 58739548 | 8.7G | 0.02 | 98.96 | 97.02 | 51.22 |
| MF-2 | 58835972 | 58818642 | 8.73G | 0.02 | 98.98 | 97.06 | 51 |
| MF-3 | 51336694 | 51321244 | 7.61G | 0.02 | 98.93 | 96.95 | 50.72 |

Table S3. Differential gene analysis between the high-dose group and the model group rats.

| gene_id | H_readcount | M_readcount | log2FoldChange | p-value | p-adj | symbol | Change |
| --- | --- | --- | --- | --- | --- | --- | --- |
| ENSRNOG00000033938 | 275.04 | 16.83 | 4.039 | 9.486E-31 | 2.1299E-26 | AABR07061136.1 | Y |
| ENSRNOG00000057344 | 4091.4 | 1327.98 | 1.6233 | 5.5602E-20 | 6.2422E-16 | AABR07051733.2 | Y |
| ENSRNOG00000030812 | 31088.65 | 8502.66 | 1.8704 | 1.1464E-18 | 8.5802E-15 | AABR07065781.1 | Y |
| ENSRNOG00000047571 | 27330.7 | 7231.76 | 1.9181 | 8.3891E-18 | 4.709E-14 | RGD1563231 | Y |
| ENSRNOG00000011895 | 38610.39 | 2507.02 | 3.945 | 1.4513E-17 | 6.517E-14 | LOC691143 | Y |
| ENSRNOG00000030332 | 1749.86 | 210.44 | 3.0549 | 3.0555E-17 | 1.1434E-13 | Ighg1 | Y |
| ENSRNOG00000008422 | 4232.19 | 454.55 | 3.2188 | 4.0103E-16 | 1.2863E-12 | Lpo | Y |
| ENSRNOG00000008525 | 717 | 78.66 | 3.1849 | 4.0183E-15 | 1.1278E-11 | Csf3 | Y |
| ENSRNOG00000045683 | 4784.9 | 88.3 | 5.7603 | 1.9006E-14 | 4.7415E-11 | LOC102553715 | Y |
| ENSRNOG00000042319 | 15011.85 | 1933.96 | 2.9564 | 4.9297E-14 | 1.1069E-10 | AABR07065814.2 | Y |
| ENSRNOG00000030575 | 6769.08 | 1579.01 | 2.1001 | 2.4835E-13 | 5.0692E-10 | AABR07013111.1 | Y |
| ENSRNOG00000048541 | 944.26 | 137.36 | 2.782 | 2.8467E-13 | 5.3265E-10 | AABR07051678.1 | Y |
| ENSRNOG00000050143 | 8956.4 | 2771.08 | 1.6926 | 1.0179E-12 | 1.7581E-09 | AABR07065815.2 | Y |
| ENSRNOG00000057443 | 287.69 | 46.04 | 2.6457 | 1.1028E-11 | 1.7686E-08 | Nos2 | N |
| ENSRNOG00000055193 | 6650.7 | 1220.35 | 2.446 | 1.8365E-11 | 2.6332E-08 | AABR07051652.1 | Y |
| ENSRNOG00000047836 | 2168.33 | 384.22 | 2.4963 | 1.8764E-11 | 2.6332E-08 | RGD1565617 | Y |
| ENSRNOG00000013616 | 98.23 | 4.47 | 4.456 | 3.0822E-11 | 4.0708E-08 | Tmem213 | Y |
| ENSRNOG00000046401 | 4137.33 | 996.65 | 2.0535 | 5.0924E-11 | 6.3522E-08 | AABR07065886.1 | Y |
| ENSRNOG00000006333 | 6766.66 | 1404.29 | 2.2685 | 6.5938E-11 | 7.7921E-08 | AABR07065789.1 | Y |
| ENSRNOG00000042083 | 4014.02 | 1519.26 | 1.4018 | 9.3565E-11 | 1.0504E-07 | AABR07051562.1 | Y |
| ENSRNOG00000059540 | 1669.53 | 434.73 | 1.941 | 1.023E-10 | 1.0938E-07 | Gcnt3 | Y |
| ENSRNOG00000048159 | 543.32 | 162.86 | 1.7379 | 1.2518E-10 | 1.2776E-07 | AABR07065778.3 | Y |
| ENSRNOG00000061431 | 4149.75 | 1277.73 | 1.6996 | 1.3641E-10 | 1.3129E-07 | AABR07061134.1 | Y |
| ENSRNOG00000002792 | 841.52 | 129.92 | 2.6953 | 1.4033E-10 | 1.3129E-07 | Cxcl2 | N |
| ENSRNOG00000050561 | 3928.16 | 1046.05 | 1.909 | 1.6477E-10 | 1.4768E-07 | Ighv1-58 | Y |
| ENSRNOG00000002843 | 4537.62 | 1189.6 | 1.9315 | 1.71E-10 | 1.4768E-07 | Cxcl6 | Y |
| ENSRNOG00000055513 | 410.5 | 15.08 | 4.7713 | 1.7916E-10 | 1.4899E-07 | AABR07061385.1 | Y |
| ENSRNOG00000033376 | 10330.08 | 790.89 | 3.7073 | 7.6892E-10 | 6.1659E-07 | AABR07065782.1 | Y |
| ENSRNOG00000049918 | 3656.36 | 1569.16 | 1.2205 | 2.7724E-09 | 2.1465E-06 | Lrg1 | Y |
| ENSRNOG00000037495 | 3621.53 | 445.04 | 3.0246 | 3.3445E-09 | 2.5032E-06 | AABR07065883.1 | Y |
| ENSRNOG00000007509 | 2564.58 | 362.01 | 2.8249 | 4.2949E-09 | 3.1108E-06 | Slc1a6 | Y |
| ENSRNOG00000018822 | 10.99 | 69.65 | -2.6602 | 6.4925E-09 | 4.5555E-06 | Slc5a5 | Y |
| ENSRNOG00000049024 | 2716.16 | 867.5 | 1.6463 | 1.0557E-08 | 7.1828E-06 | AABR07051611.1 | Y |
| ENSRNOG00000059613 | 8774.51 | 1460.57 | 2.5868 | 1.1239E-08 | 7.4221E-06 | AABR07065780.1 | Y |
| ENSRNOG00000030729 | 9556.26 | 3450.94 | 1.4695 | 1.2587E-08 | 8.0746E-06 | C4b | Y |
| ENSRNOG00000050944 | 5501.44 | 1309.64 | 2.0707 | 1.6518E-08 | 0.000010302 | AABR07065768.1 | Y |
| ENSRNOG00000007457 | 20753.28 | 8116.97 | 1.3544 | 1.6998E-08 | 0.000010315 | Serping1 | Y |
| ENSRNOG00000058118 | 664.24 | 195.88 | 1.7626 | 1.8176E-08 | 0.00001074 | AABR07065889.2 | Y |
| ENSRNOG00000010529 | 2213.21 | 699.05 | 1.6626 | 2.1246E-08 | 0.000012231 | Thbs2 | Y |
| ENSRNOG00000004649 | 2958.45 | 1036.07 | 1.5135 | 3.9149E-08 | 0.000021975 | Il1β | Y |
| ENSRNOG00000056565 | 376.37 | 1394.54 | -1.8905 | 1.2098E-07 | 0.000066252 | AABR07059002.1 | Y |
| ENSRNOG00000059981 | 6519.28 | 1136.44 | 2.52 | 1.3677E-07 | 0.000073116 | AABR07065750.3 | Y |
| ENSRNOG00000030625 | 23288.62 | 9594.09 | 1.2794 | 2.1483E-07 | 0.00010963 | Tf | Y |
| ENSRNOG00000048425 | 11112.73 | 3124.87 | 1.8304 | 3.1389E-07 | 0.00015662 | AABR07065776.3 | Y |
| ENSRNOG00000045682 | 125.37 | 38.01 | 1.7254 | 4.7239E-07 | 0.00022978 | AABR07060992.1 | Y |
| ENSRNOG00000020817 | 135.31 | 1836.15 | -3.7627 | 5.2072E-07 | 0.00024358 | Cyp2a1 | N |
| ENSRNOG00000004555 | 23016.43 | 52381.2 | -1.1864 | 6.2196E-07 | 0.000285 | Sec14l4 | Y |
| ENSRNOG00000026653 | 1594.52 | 648.05 | 1.2995 | 7.0619E-07 | 0.00031712 | Hcar2 | Y |
| ENSRNOG00000011483 | 25263.44 | 5756.57 | 2.1338 | 7.4469E-07 | 0.00032785 | S100a9 | Y |
| ENSRNOG00000006320 | 754.37 | 254.78 | 1.5654 | 8.0695E-07 | 0.00034843 | Ptges | Y |
| ENSRNOG00000057526 | 15229.14 | 7133.64 | 1.0941 | 8.3939E-07 | 0.0003556 | AABR07051642.1 | Y |
| ENSRNOG00000010635 | 13076.23 | 5367.52 | 1.2847 | 1.4711E-06 | 0.00061168 | Igfbp4 | Y |
| ENSRNOG00000007002 | 454.03 | 174.77 | 1.3759 | 1.5076E-06 | 0.00061546 | Lif | Y |
| ENSRNOG00000048232 | 21.74 | 0 | 6.9407 | 1.6164E-06 | 0.0006481 | AABR07044302.1 | Y |
| ENSRNOG00000050110 | 40.42 | 1.34 | 4.9571 | 1.8849E-06 | 0.00074248 | Stfa2 | Y |
| ENSRNOG00000036672 | 273.35 | 74.36 | 1.8774 | 2.0999E-06 | 0.00081291 | Sectm1a | Y |
| ENSRNOG00000014504 | 1088.95 | 2682.35 | 2.1 | 2.7262E-06 | 0.0010375 | Il1r1 | Y |
| ENSRNOG00000014166 | 2385.38 | 918.66 | 1.3769 | 0.000002891 | 0.0010819 | Smoc2 | Y |
| ENSRNOG00000056285 | 155.55 | 55.94 | 1.4732 | 3.4747E-06 | 0.001279 | AABR07065693.3 | Y |
| ENSRNOG00000010085 | 14.19 | 42.68 | 1.619 | 3.4747E-06 | 0.001279 | Cldn10 | Y |
| ENSRNOG00000014378 | 308.32 | 185.12 | 1.7361 | 3.4747E-06 | 0.0012574 | Il1r2 | Y |
| ENSRNOG00000048248 | 26.06 | 254.88 | -3.2882 | 3.7058E-06 | 0.0013208 | LOC100910446 | Y |
| ENSRNOG00000015850 | 381.19 | 52.18 | 2.871 | 3.9176E-06 | 0.0013744 | Rbp7 | Y |
| ENSRNOG00000056179 | 579.72 | 195.98 | 1.5651 | 4.6802E-06 | 0.001584 | AABR07061072.1 | Y |
| ENSRNOG00000060987 | 2006.49 | 355.08 | 2.4984 | 4.6975E-06 | 0.001584 | AABR07051716.2 | Y |
| ENSRNOG00000031918 | 2819.34 | 362.97 | 2.9568 | 4.7266E-06 | 0.001584 | AABR07065789.2 | Y |
| ENSRNOG00000032805 | 761.02 | 4317.66 | -2.5043 | 4.8391E-06 | 0.001584 | Cyp2f4 | Y |
| ENSRNOG00000060408 | 3068.67 | 582 | 2.3985 | 4.8679E-06 | 0.001584 | AABR07051716.1 | Y |
| ENSRNOG00000017686 | 179.93 | 54.64 | 1.7235 | 4.9693E-06 | 0.0015939 | Pi15 | Y |
| ENSRNOG00000048363 | 35.75 | 120.47 | -1.7522 | 5.4476E-06 | 0.0017227 | Dnah5 | Y |
| ENSRNOG00000003715 | 46.07 | 13.65 | 3.774 | 5.4476E-06 | 0.0017227 | Srpx2 | Y |
| ENSRNOG00000060328 | 12945.27 | 2305.82 | 2.489 | 5.7152E-06 | 0.0017823 | AABR07072262.1 | Y |
| ENSRNOG00000051653 | 5507.11 | 1814.21 | 1.602 | 6.2049E-06 | 0.0019085 | AABR07065772.2 | Y |
| ENSRNOG00000055383 | 82.93 | 27.21 | 1.6078 | 0.000007573 | 0.0022978 | AABR07067762.1 | Y |
| ENSRNOG00000005726 | 58.75 | 146.58 | -1.3168 | 8.4609E-06 | 0.0024996 | Pclo | Y |
| ENSRNOG00000055537 | 1069.02 | 416.41 | 1.3597 | 9.0335E-06 | 0.0026186 | AABR07065814.6 | Y |
| ENSRNOG00000024390 | 591.56 | 261.52 | 1.1775 | 9.0967E-06 | 0.0026186 | Osm | Y |
| ENSRNOG00000061201 | 29.85 | 0.66 | 5.5368 | 9.8138E-06 | 0.0027422 | U1 | Y |
| ENSRNOG00000027079 | 86.71 | 14.45 | 2.5787 | 9.8925E-06 | 0.0027422 | Impad1 | Y |
| ENSRNOG00000055835 | 7789.48 | 1689.52 | 2.2049 | 0.000010095 | 0.0027642 | AABR07065818.1 | Y |
| ENSRNOG00000047920 | 22.19 | 0 | 6.9688 | 0.000010384 | 0.002809 | AABR07061078.1 | Y |
| ENSRNOG00000025245 | 1029.2 | 440.43 | 1.2248 | 0.000010869 | 0.0029053 | RGD1311946 | Y |
| ENSRNOG00000062252 | 56.32 | 523.93 | -3.218 | 0.000011203 | 0.0029535 | AABR07072853.5 | Y |
| ENSRNOG00000049104 | 11.79 | 106.54 | -3.1783 | 0.000011381 | 0.0029535 | LOC100911256 | Y |
| ENSRNOG00000001794 | 617.96 | 69.76 | 3.1459 | 0.000011444 | 0.0029535 | Muc13 | Y |
| ENSRNOG00000050652 | 68.52 | 19.06 | 1.8501 | 0.000012806 | 0.0032674 | AABR07065839.1 | Y |
| ENSRNOG00000032871 | 52.06 | 269.3 | -2.3742 | 0.000013354 | 0.0033253 | Mlc1 | Y |
| ENSRNOG00000029223 | 689.91 | 227.58 | 1.5995 | 0.000013439 | 0.0033253 | Prss32 | Y |
| ENSRNOG00000056447 | 2567.17 | 739.6 | 1.7955 | 0.000013477 | 0.0033253 | AABR07051658.1 | Y |
| ENSRNOG00000023209 | 1380.81 | 610.54 | 1.1768 | 0.000013775 | 0.0033454 | Slamf7 | Y |
| ENSRNOG00000004630 | 6.3 | 414.47 | -6.0413 | 0.000013973 | 0.0033454 | Rag1 | N |
| ENSRNOG00000020484 | 155.48 | 747.29 | -2.2651 | 0.000014006 | 0.0033454 | Trpm5 | Y |
| ENSRNOG00000061576 | 10764.88 | 4621.88 | 1.2198 | 0.000014417 | 0.0034074 | AABR07051564.1 | Y |
| ENSRNOG00000030177 | 388.52 | 127.56 | 1.6091 | 0.000015712 | 0.0036747 | AABR07060979.1 | Y |
| ENSRNOG00000035594 | 9.85 | 48.89 | -2.3221 | 0.000016053 | 0.003716 | Mirlet7d | Y |
| ENSRNOG00000050118 | 3159.99 | 1291.87 | 1.2904 | 0.000018821 | 0.0043122 | AABR07065750.2 | Y |
| ENSRNOG00000014471 | 20.1 | 102.5 | -2.3531 | 0.000019052 | 0.0043199 | B3gnt6 | N |
| ENSRNOG00000059121 | 500.04 | 123.38 | 2.0176 | 0.00001924 | 0.0043199 | AABR07065714.1 | Y |
| ENSRNOG00000049523 | 38.98 | 7.89 | 2.2959 | 0.00002567 | 0.0057066 | AC097153.2 | Y |
| ENSRNOG00000007320 | 3092.57 | 1036.48 | 1.5773 | 0.000026996 | 0.0059425 | Fam3d | Y |
| ENSRNOG00000005053 | 735.97 | 229.71 | 1.6799 | 0.000027964 | 0.0060959 | Egln3 | Y |
| ENSRNOG00000053899 | 4546.55 | 1205.46 | 1.9151 | 0.000031122 | 0.006719 | AABR07051731.1 | Y |
| ENSRNOG00000000257 | 990.15 | 438.29 | 1.176 | 0.000034239 | 0.0073217 | Smpd3 | Y |
| ENSRNOG00000012165 | 189.61 | 712.5 | -1.909 | 0.000035167 | 0.0074491 | Itprid1 | N |
| ENSRNOG00000007607 | 4419.44 | 1865.42 | 1.2444 | 0.000039615 | 0.0083129 | Nr4a1 | N |
| ENSRNOG00000030012 | 400.55 | 165.13 | 1.2794 | 0.000040598 | 0.0083931 | Clec4a2 | Y |
| ENSRNOG00000014373 | 28.46 | 83.57 | -1.5499 | 0.000040745 | 0.0083931 | Trim66 | Y |
| ENSRNOG00000050586 | 25.18 | 1.68 | 3.9501 | 0.000041885 | 0.0085495 | AABR07034362.2 | Y |
| ENSRNOG00000002723 | 225.07 | 79.67 | 1.497 | 0.000042471 | 0.0085909 | Sele | Y |
| ENSRNOG00000023340 | 58.15 | 10.49 | 2.4816 | 0.000043286 | 0.0086019 | Tmem72 | Y |
| ENSRNOG00000020560 | 6232.53 | 1118.49 | 2.4781 | 0.000043291 | 0.0086019 | AABR07005821.1 | Y |
| ENSRNOG00000055375 | 14930.3 | 4105.91 | 1.8624 | 0.000043995 | 0.0086198 | AABR07065837.1 | Y |
| ENSRNOG00000013463 | 349.38 | 157.47 | 1.1506 | 0.000044149 | 0.0086198 | Kcnj8 | Y |
| ENSRNOG00000004623 | 2.08 | 46.3 | -4.4789 | 0.000044952 | 0.0087009 | Rag2 | Y |
| ENSRNOG00000047786 | 186.91 | 10.37 | 4.1741 | 0.000049612 | 0.0095207 | Ogn | Y |
| ENSRNOG00000035633 | 166.07 | 675.72 | -2.0249 | 0.000055299 | 0.010522 | Mir142 | Y |
| ENSRNOG00000058590 | 3166.58 | 1034.76 | 1.6134 | 0.000057711 | 0.010889 | AABR07034739.3 | Y |
| ENSRNOG00000058824 | 3557.19 | 1674.05 | 1.0875 | 0.000077936 | 0.014583 | AABR07065789.3 | Y |
| ENSRNOG00000045790 | 309.98 | 55.62 | 2.4775 | 0.000083229 | 0.015444 | Fam50a | Y |
| ENSRNOG00000030981 | 663.18 | 1479.57 | -1.158 | 0.000095298 | 0.017539 | Scnn1b | Y |
| ENSRNOG00000061561 | 76.24 | 8.47 | 3.1755 | 0.000097108 | 0.017716 | AABR07018373.1 | Y |
| ENSRNOG00000038132 | 304.51 | 137.92 | 1.1447 | 0.00010383 | 0.018504 | Vsig4 | Y |
| ENSRNOG00000016571 | 841.95 | 180.84 | 2.2203 | 0.00010384 | 0.018504 | Ngf | Y |
| ENSRNOG00000035636 | 2.4 | 30.64 | -3.6702 | 0.00010885 | 0.01916 | Mirlet7b | Y |
| ENSRNOG00000013280 | 2632.77 | 751.46 | 1.809 | 0.00010923 | 0.01916 | Olfm4 | Y |
| ENSRNOG00000048062 | 6358.96 | 1863.87 | 1.7705 | 0.00011024 | 0.019188 | AABR07065815.1 | Y |
| ENSRNOG00000047082 | 3.7 | 28.46 | -2.9233 | 0.0001114 | 0.01924 | Pigz | Y |
| ENSRNOG00000001777 | 2426.06 | 640.31 | 1.5645 | 0.0001114 | 0.01924 | Muc4 | Y |
| ENSRNOG00000045686 | 22.43 | 203.6 | -3.1834 | 0.00011961 | 0.0205 | Nfs1 | Y |
| ENSRNOG00000062180 | 32.65 | 0.29 | 6.5668 | 0.0001375 | 0.023389 | AABR07072539.6 | Y |
| ENSRNOG00000056393 | 780.64 | 173.54 | 2.1685 | 0.00014123 | 0.023842 | AABR07051555.1 | Y |
| ENSRNOG00000002831 | 17.04 | 64.39 | -1.923 | 0.00014407 | 0.024102 | Wfikkn2 | Y |
| ENSRNOG00000049925 | 65.39 | 512.85 | -2.9709 | 0.00014492 | 0.024102 | Cd79al | N |
| ENSRNOG00000061358 | 30.89 | 248.58 | -3.0083 | 0.0001472 | 0.024302 | AC129365.1 | Y |
| ENSRNOG00000048167 | 1994.09 | 770.22 | 1.3719 | 0.00015026 | 0.024626 | AABR07051551.1 | Y |
| ENSRNOG00000013605 | 98.58 | 538.04 | -2.4493 | 0.00015317 | 0.024922 | AC120568.1 | Y |
| ENSRNOG00000049394 | 18.39 | 178.32 | -3.2764 | 0.00015592 | 0.025187 | LOC679739 | Y |
| ENSRNOG00000003095 | 1663.78 | 4568.75 | -1.4574 | 0.00015959 | 0.025595 | Fgfbp1 | Y |
| ENSRNOG00000012481 | 969.59 | 350.71 | 1.4676 | 0.00017282 | 0.027143 | Ppm1j | Y |
| ENSRNOG00000037340 | 839.9 | 252.11 | 1.7355 | 0.00017287 | 0.027143 | Epha10 | Y |
| ENSRNOG00000053446 | 2089.92 | 698.29 | 1.582 | 0.00017627 | 0.027484 | AABR07051665.1 | Y |
| ENSRNOG00000035531 | 21.6 | 73.67 | -1.7757 | 0.00019268 | 0.029837 | Mir25 | Y |
| ENSRNOG00000012134 | 128.09 | 325.76 | -1.3482 | 0.00019718 | 0.030324 | Scn4a | Y |
| ENSRNOG00000059007 | 280.42 | 63.47 | 2.1409 | 0.00020379 | 0.03098 | AABR07061005.2 | Y |
| ENSRNOG00000012906 | 477.75 | 189.25 | 1.3361 | 0.00020421 | 0.03098 | Bcas1 | Y |
| ENSRNOG00000014137 | 4551.28 | 2240.43 | 1.0226 | 0.00021642 | 0.032395 | Fbln1 | Y |
| ENSRNOG00000051694 | 461.88 | 65.23 | 2.8233 | 0.00023426 | 0.034604 | AABR07065651.6 | Y |
| ENSRNOG00000008586 | 169.59 | 82 | 1.0484 | 0.00023673 | 0.034741 | Aldh1l2 | Y |
| ENSRNOG00000021011 | 561.03 | 236.61 | 1.2447 | 0.00023908 | 0.034858 | Fut2 | Y |
| ENSRNOG00000054828 | 10325.24 | 4669.86 | 1.1447 | 0.00024449 | 0.035208 | AABR07051708.1 | Y |
| ENSRNOG00000062228 | 118.64 | 43.32 | 1.4475 | 0.00024462 | 0.035208 | LOC100359515 | Y |
| ENSRNOG00000013932 | 226.87 | 71.74 | 1.6591 | 0.0002473 | 0.035368 | Rbp2 | Y |
| ENSRNOG00000047560 | 29.22 | 3.5 | 3.0606 | 0.00025864 | 0.036326 | AABR07040288.1 | Y |
| ENSRNOG00000034038 | 5624.08 | 976.45 | 2.5258 | 0.00025876 | 0.036326 | AABR07005844.1 | Y |
| ENSRNOG00000017237 | 163.7 | 52.54 | 1.6398 | 0.00025886 | 0.036326 | Lama1 | Y |
| ENSRNOG00000006146 | 51.22 | 240.6 | -2.233 | 0.00026886 | 0.037263 | Trim54 | Y |
| ENSRNOG00000020539 | 13951.08 | 3190.75 | 1.0809 | 0.00029531 | 0.040557 | Muc1 | Y |
| ENSRNOG00000048458 | 153.1 | 41.9 | 1.8696 | 0.00029531 | 0.040557 | AABR07065705.1 | Y |
| ENSRNOG00000027350 | 130.06 | 52.01 | 1.3249 | 0.00030245 | 0.041158 | Tns4 | Y |
| ENSRNOG00000012878 | 81.84 | 299.67 | -1.8741 | 0.00030554 | 0.041276 | Atp7b | Y |
| ENSRNOG00000060831 | 625.53 | 3035.78 | -2.2789 | 0.000307 | 0.041276 | Clca1 | Y |
| ENSRNOG00000010018 | 2735.52 | 1256.09 | 1.123 | 0.00030978 | 0.041402 | Clec4a3 | Y |
| ENSRNOG00000047535 | 6131.39 | 1652.69 | 1.8914 | 0.00031957 | 0.042458 | AABR07051670.1 | Y |
| ENSRNOG00000010478 | 6199.9 | 1016.85 | 2.6082 | 0.00034009 | 0.044655 | LOC299282 | Y |
| ENSRNOG00000057702 | 7.21 | 34.89 | -2.2743 | 0.00035241 | 0.045737 | Insrr | Y |
| ENSRNOG00000058352 | 1260.6 | 441.07 | 1.5147 | 0.00036251 | 0.046779 | AABR07065699.4 | Y |
| ENSRNOG00000047459 | 53.8 | 17.24 | 1.6495 | 0.00037399 | 0.047829 | H1f4 | Y |
| ENSRNOG00000013428 | 96.22 | 34.64 | 1.478 | 0.00037491 | 0.047829 | Atp6v0a4 | Y |
| ENSRNOG00000060746 | 144.92 | 19.81 | 2.8695 | 0.00038176 | 0.048112 | AABR07060994.1 | Y |
| ENSRNOG00000007886 | 69.31 | 20.41 | 1.7627 | 0.00038269 | 0.048112 | Orm1 | Y |
| ENSRNOG00000001165 | 20.08 | 76.45 | -1.9301 | 0.00038356 | 0.048112 | Tmprss3 | Y |
| ENSRNOG00000039906 | 0 | 10.36 | -5.7641 | 0.00038965 | 0.048605 | Abo3 | Y |
| ENSRNOG00000000195 | 1308.28 | 304.37 | 2.1043 | 0.00039677 | 0.049219 | LOC108348048 | Y |

Table S4. Identification of high-content components in BTHTT based on base peak chromatogram analysis.

| ID | No | m/z | RT min | Formula | ppm | compound name | adduct | score | Product Ion |
| --- | --- | --- | --- | --- | --- | --- | --- | --- | --- |
| 1 | M144T123_3 | 144.0477 | 2.04 | C12H17N4OS | 1.6 | vitamin B1 | [Cat-C6H7N3]+ | 0.9665 | [144.05, 104.03, 127.05, 145.05, 129.02] |
| 2 | M166T139_4 | 166.0861 | 2.32 | C17H17NO3 | 2.3 | N-(Phenylacetyl)-L-phenylalanine | [M+H-C8H6O]+ | 0.9995 | [120.08, 103.05, 131.05, 93.07, 166.09] |
| 3 | M298T156_1 | 298.1434 | 2.61 | C18H19NO3 | 0.7 | 2,8-Diphenyl-1-aza-3,7-dioxabicyclo[3.3.0]oct-5-ylmethanol | [M+H]+ | 0.8639 | [298.14, 223.08, 255.1, 195.08, 167.09] |
| 4 | M205T182_2 | 205.0965 | 3.03 | C11H12N2O2 | 2.2 | L-Tryptophan | [M+H]+ | 0.9962 | [188.07, 146.06, 118.07, 144.08, 132.08] |
| 5 | M314T192_2 | 314.1781 | 3.19 | C19H23NO3 | 0.6 | Codethyline | [M+H]+ | 0.9557 | [314.17, 107.05, 269.12, 314.14, 175.08] |
| 6 | M310T207_3 | 310.1647 | 3.46 | C16H24NO5 | 1.6 | Sinapine cation | [Cat]+ | 0.989 | [251.09, 175.04, 207.07, 147.04, 119.05] |
| 7 | M342T221 | 342.1698 | 3.68 | C20H24NO4+ | 0.9 | Magnoflorine | [M]+ | 0.9349 | [342.17, 297.11, 265.09, 282.09, 237.09] |
| 8 | M287T277_3 | 287.0539 | 4.61 | C15H10O6 | 0.5 | Luteolin | [M+H]+ | 0.9997 | [287.05, 153.02, 135.04, 241.05, 161.02] |
| 9 | M289T291_4 | 289.1752 | 4.85 | C16H26O3 | 5 | Tetranor-12(R)-HETE | [M+Na]+ | 0.7968 | [289.18, 272.15, 120.07, 124.11, 102.06] |
| 10 | M338T324_4 | 338.1385 | 5.4 | C20H20NO4+ | 0.7 | Neprotin | [M]+ | 0.997 | [338.14, 322.11, 323.11, 294.11, 279.09] |
| 11 | M163T352_3 | 163.0389 | 5.87 | C16H18O9 | 1.7 | Heriguard | [M+H-C7H12O6]+ | 0.9869 | [163.04, 135.04, 117.03, 145.03, 107.05] |
| 12 | M336T370_2 | 336.1229 | 6.17 | C20H18NO4+ | 0 | Majarine | [M+]+ | 0.9942 | [336.12, 320.09, 292.1, 321.1, 278.08] |
| 13 | M285T447_3 | 285.0756 | 7.45 | C16H12O5 | 0.5 | Calycosin | [M+H]+ | 0.9995 | [285.08, 270.05, 253.05, 225.05, 137.02] |
| 14 | M309T707_4 | 309.1118 | 11.78 | C19H16O4 | 1 | Warfarin | [M+H]+ | 0.8192 | [309.11, 265.12, 223.08, 250.1, 236.08] |
| 15 | M297T798_3 | 297.1482 | 13.3 | C19H20O3 | 0.7 | Cryptotanshinone | [M+H]+ | 0.9981 | [297.15, 251.14, 254.09, 279.14, 282.12] |
| 16 | M295T848_3 | 295.1326 | 14.13 | C19H18O3 | 1.2 | Tanshinone IIA | [M+H]+ | 0.9951 | [295.13, 277.12, 249.13, 252.08, 262.1] |
| 17 | M197T152_2 | 197.044 | 2.54 | C9H10O5 | 5.7 | (R)-3-(3,4-Dihydroxyphenyl)lactate | [M-H]- | 0.7824 | [135.04, 123.04, 179.03, 197.04, 109.03] |
| 18 | M137T210_1 | 137.023 | 3.51 | C15H12O6 | 10 | Violaceic acid | [M-H-C8H6O3]- | 0.9982 | [137.02, 136.02, 108.02, 138.03, 109.03] |
| 19 | M175T218_3 | 175.0599 | 3.64 | C7H12O5 | 8.4 | 2-Isopropylmalic acid | [M-H]- | 0.9695 | [115.04, 175.06, 113.06, 157.05, 131.07] |
| 20 | M305T233_4 | 305.0688 | 3.89 | C12H18O7S | 1.7 | 2-[3-oxo-2-(5-sulfooxypent-2-enyl)cyclopentyl]acetic acid | [M-H]- | 0.7951 | [305.07, 96.96, 225.11, 306.07, 147.08] |
| 21 | M165T237_3 | 165.0179 | 3.95 | C8H6O4 | 8.7 | 4-Formyl-2-hydroxybenzoic acid | [M-H]- | 0.9985 | [121.03, 165.02, 122.03, 121.05, 93.03] |
| 22 | M167T244_3 | 167.0335 | 4.07 | C8H8O4 | 9.4 | 3,4-Dihydroxyphenylacetic acid | [M-H]- | 0.9994 | [123.04, 167.03, 152.01, 108.02, 91.02] |
| 23 | M367T256_3 | 367.102 | 4.26 | C17H20O9 | 4.3 | 3-O-Feruloylquinic acid | [M-H]- | 0.9864 | [191.05, 93.03, 173.04, 134.04, 193.05] |
| 24 | M447T275_3 | 447.0918 | 4.59 | C21H20O11 | 2.5 | Maritimein | [M-H]- | 0.9912 | [285.04, 447.09, 133.03, 151.0, 284.03] |
| 25 | M521T302_3 | 521.1282 | 5.04 | C24H26O13 | 3.9 | Salviaflaside | [M-H]- | 0.8934 | [161.02, 359.08, 135.04, 323.08, 179.03] |
| 26 | M753T313_1 | 753.2225 | 5.21 | C34H42O19 | 2.4 | 3',6-Disinapoylsucrose | [M-H]- | 0.9937 | [205.05, 190.03, 175.0, 547.16, 753.22] |
| 27 | M493T352_3 | 493.1125 | 5.87 | C26H22O10 | 3.3 | Salvianolic acid A | [M-H]- | 0.9891 | [295.06, 109.03, 185.02, 135.04, 159.04] |
| 28 | M359T354_1 | 359.0762 | 5.9 | C18H16O8 | 3 | Rosmarinic acid | [M-H]- | 0.986 | [161.02, 197.04, 133.03, 135.04, 179.03] |
| 29 | M717T373_2 | 717.144 | 6.22 | C36H30O16 | 2.7 | Salvianolic acid b | [M-H]- | 0.9661 | [321.04, 519.09, 339.05, 295.06, 185.02] |
| 30 | M493T408_3 | 493.1124 | 6.8 | C27H22O12 | 3.8 | Lithospermic acid | [M-H-CO2]- | 0.9663 | [295.06, 109.03, 185.02, 135.04, 159.04] |
| 31 | M327T551_2 | 327.2167 | 9.19 | C18H32O5 | 1.3 | FA 18:2+3o | [M-H]- | 0.9915 | [327.22, 211.13, 171.1, 229.14, 183.14] |
| 32 | M267T592_3 | 267.0654 | 9.86 | C16H12O4 | 2.4 | Formononetin | [M-H]- | 0.9933 | [252.04, 267.07, 223.04, 251.03, 132.02] |
| 33 | M329T600_2 | 329.2326 | 10 | C18H34O5 | 3.7 | 9-Octadecenoic acid, 5,8,11-trihydroxy- | [M-H]- | 0.994 | [329.23, 171.1, 211.13, 139.11, 229.14] |
| 34 | M329T644_2 | 329.2323 | 10.73 | C18H34O5 | 0.7 | FA 18:1+3o | [M-H]- | 0.9846 | [329.23, 199.13, 171.1, 201.11, 211.13] |
| 35 | M871T682_2 | 871.4671 | 11.36 | C43H70O15 | 4.2 | Astragaloside II | [M+HCO2]- | 0.9954 | [871.47, 825.46, 765.44, 179.05, 119.03] |
| 36 | M311T716_3 | 311.2218 | 11.94 | C18H32O4 | 3.5 | (9Z,12E)-15,16-Dihydroxyoctadeca-9,12-dienoic acid | [M-H]- | 0.9878 | [311.22, 223.17, 293.21, 201.11, 312.22] |
| 37 | M313T728_3 | 313.1435 | 12.14 | C19H24O5 | 3.3 | Gibberellin A4 | [M-H-H2O]- | 0.8986 | [313.14, 213.13, 269.15, 213.09, 226.1] |
| 38 | M913T739 | 913.4774 | 12.31 | C26H35NO6 | 9.7 | 2-(2',4-Dihydroxy-6-keto-1',1',4'a,6'-tetramethylspiro[3,8-dihydrofur[2,3-e]isoindole-2,5'-decalin]-7-yl)propionic acid | [2M-H]- | 0.8431 | [913.48, 867.47, 825.47, 807.45, 101.02] |

Table S5. The analysis of transitional components in blood for BTHTT.

| Peak number（high content components） | No | m/z | RT min | Formula | ppm | compound name | adduct | score | Product Ion |
| --- | --- | --- | --- | --- | --- | --- | --- | --- | --- |
| 1 | 1 | 144.0477 | 2.04 | C12H17N4OS | 1.6 | vitamin B1 | [Cat-C6H7N3]+ | 0.9665 | [144.05, 104.03, 127.05, 145.05, 129.02] |
| 7 | 2 | 342.1698 | 3.68 | C20H24NO4+ | 0.9 | Magnoflorine | [M]+ | 0.9349 | [342.17, 297.11, 265.09, 282.09, 237.09] |
| 15 | 3 | 297.1482 | 13.3 | C19H20O3 | 0.7 | Cryptotanshinone | [M+H]+ | 0.9981 | [297.15, 251.14, 254.09, 279.14, 282.12] |
| 16 | 4 | 295.1326 | 14.13 | C19H18O3 | 1.2 | Tanshinone IIA | [M+H]+ | 0.9951 | [295.13, 277.12, 249.13, 252.08, 262.1] |
| 22 | 5 | 167.0335 | 4.07 | C8H8O4 | 9.4 | 3,4-Dihydroxyphenylacetic acid | [M-H]- | 0.9994 | [123.04, 167.03, 152.01, 108.02, 91.02] |
| 27 | 6 | 493.1125 | 5.87 | C26H22O10 | 3.3 | Salvianolic acid A | [M-H]- | 0.9891 | [295.06, 109.03, 185.02, 135.04, 159.04] |
| 37 | 7 | 313.1435 | 12.14 | C19H24O5 | 3.3 | Gibberellin A4 | [M-H-H2O]- | 0.8986 | [313.14, 213.13, 269.15, 213.09, 226.1] |
|  | 8 | 332.0893 | 8.39 | C20H14NO4 | 5 | Sangrovit | [M]+ | 0.9989 | [332.09, 315.06, 332.19, 138.06, 129.05] |
|  | 9 | 353.1148 | 12.18 | C19H16N2O5 | 4.6 | IOX2 | [M+H]+ | 0.9874 | [353.11, 353.22, 131.05, 353.17, 93.07] |
|  | 10 | 513.3555 | 12.68 | C30H50O5 | 1.7 | Cycloastragenol | [M+Na]+ | 0.9997 | [513.35, 514.36, 128.33, 104.11, 513.18] |
|  | 11 | 419.1829 | 13.02 | C24H28O5 | 1.5 | 2',4,4',6'-Tetramethylether-3'-prenylchalcone | [M+Na]+ | 0.9516 | [419.18, 229.08, 213.09, 419.33, 254.11] |
|  | 12 | 447.129 | 7.72 | C22H22O10 | 1.3 | Sissotrin | [M+H]+ | 0.9991 | [285.08, 270.05, 229.09, 253.05, 242.06] |
|  | 13 | 437.142 | 5.12 | C19H26O10 | 1.2 | Benzyl 6-O-(4-carboxy-3-hydroxy-3-methylbutanoyl)hexopyranoside | [M+Na]+ | 0.9981 | [437.14, 375.14, 437.2, 377.12, 293.1] |
|  | 14 | 281.0443 | 5.53 | C16H10O6 | 0.8 | 3,8-Dihydroxy-1-methylanthraquinone-2-carboxylic acid | [M+H-H2O]+ | 0.9878 | [281.04, 225.05, 253.05, 197.06, 207.04] |
|  | 15 | 651.2926 | 12.18 | C19H22O4 | 0.8 | Anisocoumarin h | [2M+Na]+ | 0.9854 | [337.14, 337.22, 669.29, 355.23, 651.38] |
|  | 16 | 229.0859 | 9.83 | C16H16O5 | 0.8 | (.+/-.)-Columbianetin acetate | [M+H-C2H4O2]+ | 0.9313 | [187.04, 229.09, 143.05, 185.1, 142.08] |
|  | 17 | 253.1586 | 12.18 | C18H22O2 | 0.8 | Estra-4,9-diene-3,17-dione | [M+H-H2O]+ | 0.9092 | [253.16, 223.11, 238.13, 211.11, 211.15] |
|  | 18 | 447.0922 | 5.7 | C21H18O11 | 0.7 | Apigenin 7-glucuronide | [M+H]+ | 0.9994 | [271.06, 447.09, 153.02, 272.06, 119.05] |
|  | 19 | 131.0492 | 4.67 | C9H10O3 | 0.7 | Caffeic alcohol | [M+H-2H2O]+ | 0.9989 | [103.05, 131.05, 95.05, 104.06, 102.05] |
|  | 20 | 294.1488 | 11.05 | C19H19NO2 | 0.7 | Dehydronuciferine | [M+H]+ | 0.9816 | [294.15, 279.13, 294.08, 250.09, 264.1] |
|  | 21 | 369.2785 | 13.26 | C25H42O5 | 0.7 | Cholic acid methyl ester | [M+H-3H2O]+ | 0.9754 | [369.28, 105.07, 337.25, 145.1, 159.12] |
|  | 22 | 317.102 | 7.41 | C17H16O6 | 0.7 | Byakangelicol | [M+H]+ | 0.9593 | [233.04, 231.03, 218.02, 317.17, 175.04] |
|  | 23 | 260.197 | 1.43 | C12H25N3O3 | 0.7 | Lys-Ile | [M+H]+ | 0.943 | [260.2, 129.1, 243.17, 147.11, 130.09] |
|  | 24 | 299.1277 | 13.71 | C19H20O6 | 0.6 | Teucrin A | [M+H-CH2O2]+ | 0.9571 | [299.13, 281.12, 253.12, 256.07, 235.11] |
|  | 25 | 135.044 | 5.33 | C14H12N2O5 | 0.6 | N-(2-Hydroxy-4-nitrophenyl)-4-methoxybenzamide | [M+H-C6H6N2O3]+ | 0.9513 | [135.04, 107.05, 95.05, 107.09, 136.06] |
|  | 26 | 334.1649 | 1.59 | C18H23NO5 | 0.5 | Seneciphylline | [M+H]+ | 0.9695 | [334.16, 201.09, 316.15, 213.09, 255.1] |
|  | 27 | 287.164 | 13.64 | C18H22O3 | 0.5 | 9(11)-Didehydroestriol | [M+H]+ | 0.9467 | [269.15, 287.16, 199.08, 254.13, 213.09] |
|  | 28 | 327.1226 | 11.78 | C19H20O6 | 0.5 | 6a,7,8,12a-Tetrahydroxy-3-methyl-2,3,4,5,6,7-hexahydrobenzo[a]anthracene-1,12-dione | [M+H-H2O]+ | 0.9019 | [309.11, 265.12, 223.08, 250.1, 236.08] |
|  | 29 | 463.1234 | 5.5 | C22H22O11 | 0.4 | Tectoridin | [M+H]+ | 0.9893 | [301.07, 286.05, 241.05, 269.04, 153.02] |
|  | 30 | 120.0809 | 2.97 | C18H20N2O3 | 0.4 | Phenylalanylphenylalanine | [M+H-C10H11NO3]+ | 0.9795 | [120.08, 103.05, 93.07, 120.06, 91.05] |
|  | 31 | 177.0545 | 6.8 | C16H14O6 | 0.4 | Hesperetin | [M+H-C6H6O3]+ | 0.9736 | [177.05, 117.03, 149.06, 163.04, 134.04] |
|  | 32 | 299.0914 | 8.6 | C17H14O5 | 0.4 | 3',4'-Dimethoxyflavonol | [M+H]+ | 0.9571 | [299.09, 283.06, 237.05, 299.13, 266.06] |
|  | 33 | 464.3006 | 8.9 | C26H41NO6 | 0.4 | ((R)-4-((3R,5R,6S,7R,8S,9S,10R,13R,14S,17R)-3,6,7-trihydroxy-10,13-dimethylhexadecahydro-1H-cyclopenta[a]phenanthren-17-yl)pent-2-enoyl)glycine | [M+H]+ | 0.9088 | [307.24, 335.24, 325.25, 353.25, 95.09] |
|  | 34 | 340.3575 | 14.52 | C22H45NO | 0.3 | Behenamide | [M+H]+ | 0.9832 | [340.36, 102.09, 340.28, 116.11, 340.16] |
|  | 35 | 338.3416 | 17.23 | C22H43NO | 0.3 | Erucamide | [M+H]+ | 0.9612 | [338.34, 321.32, 97.1, 303.3, 95.09] |
|  | 36 | 176.0198 | 5.05 | C6H9NOS2 | 0.3 | (-)-Sulforaphene | [M+H]+ | 0.955 | [112.02, 176.02, 96.04, 103.02, 117.04] |
|  | 37 | 430.2949 | 11.36 | C26H43NO6 | 0.3 | N-Choloylglycine | [M+H-2H2O]+ | 0.9173 | [412.28, 430.3, 337.25, 158.08, 355.26] |
|  | 38 | 263.0815 | 3.81 | C16H10O2N2 | 0.1 | Indigo | [M+H]+ | 0.9988 | [263.08, 235.09, 219.09, 132.04, 262.07] |
|  | 39 | 207.0651 | 5.21 | C13H16O5 | 0.1 | Ethyl (2E)-3-(4-hydroxy-3,5-dimethoxyphenyl)-2-propenoate | [M+H-C2H6O]+ | 0.9547 | [175.04, 119.05, 147.04, 91.05, 207.07] |
|  | 40 | 301.1434 | 10.78 | C18H22O5 | 0.1 | Zearalenone | [M+H-H2O]+ | 0.9261 | [283.13, 301.14, 265.12, 241.12, 255.1] |
|  | 41 | 555.1109 | 5.45 | C25H24O13 | 0.1 | 6'-Malonyltrifolirhizin | [M+Na]+ | 0.9177 | [511.12, 555.11, 307.06, 469.11, 552.15] |
|  | 42 | 315.2319 | 12.74 | C21H30O2 | 0 | Progesterone | [M+H]+ | 0.9965 | [315.23, 97.07, 109.07, 297.22, 123.08] |
|  | 43 | 144.0654 | 1.91 | C6H9NO3 | 0 | (2R)-6-Ketopipecolinic acid | [M+H]+ | 0.9703 | [144.05, 98.06, 104.03, 144.07, 99.04] |
|  | 44 | 247.133 | 11.61 | C15H22O4 | 4.9 | Sydonic acid | [M-H-H2O]- | 0.9315 | [247.13, 203.14, 107.05, 221.15, 188.12] |
|  | 45 | 247.133 | 12.33 | C15H20O3 | 4.6 | Rupestonic acid | [M-H]- | 0.9929 | [203.14, 247.13, 161.1, 204.15, 201.13] |
|  | 46 | 251.0586 | 5.28 | C13H10N4O2S | 4.1 | 1,2-Benzenediol, 4-[2-(2-pyrimidinylamino)-4-thiazolyl]- | [M-H-H2S]- | 0.9375 | [251.06, 207.07, 169.09, 125.1, 252.06] |
|  | 47 | 285.1487 | 11.54 | C18H22O3 | 3.8 | 16.alpha.-Hydroxyestrone | [M-H]- | 0.9742 | [285.15, 285.2, 255.14, 286.15, 240.11] |
|  | 48 | 297.1122 | 13.66 | C18H18O4 | 3.5 | 4',6'-Dimethoxy-2'-hydroxy-4-methylchalcone | [M-H]- | 0.926 | [297.11, 269.12, 297.24, 253.09, 298.12] |
|  | 49 | 325.092 | 3.52 | C15H18O8 | 3.3 | 4-O-D-Glucopyranosyl-p-coumaric acid | [M-H]- | 0.9985 | [119.05, 163.04, 163.02, 120.05, 325.14] |
|  | 50 | 265.1436 | 11.64 | C15H22O4 | 3.3 | Dendocarbin M | [M-H]- | 0.9764 | [221.15, 265.15, 96.96, 221.1, 222.16] |
|  | 51 | 347.1854 | 9.7 | C20H28O5 | 3.3 | Gibberellin A14 | [M-H]- | 0.9331 | [347.19, 314.15, 303.2, 285.18, 348.19] |
|  | 52 | 445.0766 | 5.7 | C21H18O11 | 3.2 | Baicalin | [M-H]- | 0.9848 | [269.04, 113.02, 145.03, 117.03, 137.02] |
|  | 53 | 331.1905 | 12.14 | C20H28O4 | 3.2 | Hautriwaic acid | [M-H]- | 0.958 | [331.19, 301.18, 271.17, 283.17, 332.19] |
|  | 54 | 347.1491 | 9.21 | C19H24O6 | 3.2 | Eurycomalactone | [M-H]- | 0.9174 | [347.15, 303.19, 347.24, 285.15, 347.19] |
|  | 55 | 461.0715 | 5.63 | C21H18O12 | 3.1 | Kaempferol 3-glucuronoside | [M-H]- | 0.9859 | [285.04, 229.05, 113.02, 257.04, 461.06] |
|  | 56 | 461.1079 | 5.3 | C22H22O11 | 3.1 | Diosmetin 7-O-beta-D-glucopyranoside | [M-H]- | 0.9004 | [299.05, 461.11, 284.03, 256.04, 151.0] |
|  | 57 | 311.1279 | 13.1 | C19H20O4 | 3 | 1-(3,4-Dihydroxyphenyl)-7-(4-hydroxyphenyl)-4-hepten-3-one | [M-H]- | 0.9068 | [311.13, 255.14, 283.13, 311.22, 312.13] |
|  | 58 | 285.076 | 7.29 | C16H14O5 | 2.9 | Homobutein | [M-H]- | 0.9368 | [285.08, 135.01, 153.02, 91.02, 270.05] |
|  | 59 | 325.1072 | 11.74 | C19H18O5 | 2.9 | Unguinol | [M-H]- | 0.914 | [281.12, 265.09, 237.09, 325.11, 266.09] |
|  | 60 | 357.1081 | 3.89 | C9H9NO3 | 2.8 | Hippuric acid | [2M-H]- | 0.9986 | [178.05, 134.06, 179.05, 301.24, 214.94] |
|  | 61 | 313.1433 | 12.77 | C19H22O4 | 2.8 | Platyphyllonol | [M-H]- | 0.9223 | [313.14, 283.13, 255.14, 295.13, 267.14] |
|  | 62 | 329.087 | 2.5 | C14H18O9 | 2.6 | 4-(Hexopyranosyloxy)-3-methoxybenzoic acid | [M-H]- | 0.9645 | [167.03, 108.02, 152.01, 123.04, 168.04] |
|  | 63 | 313.1072 | 7.91 | C18H18O5 | 2.6 | 2'-Hydroxy-3,4,6'-trimethoxychalcone | [M-H]- | 0.9355 | [313.11, 283.1, 255.1, 282.09, 295.1] |
|  | 64 | 397.1126 | 6.63 | C7H9N3O4 | 2.5 | (.+/-.)-Willardiine | [2M-H]- | 0.9903 | [111.01, 173.01, 191.02, 179.11, 112.01] |
|  | 65 | 225.0983 | 0.69 | C9H14N4O3 | 2.5 | Carnosine | [M-H]- | 0.9731 | [110.07, 154.06, 225.1, 163.1, 93.04] |
|  | 66 | 459.0921 | 5.38 | C22H20O11 | 2.4 | Oroxyloside | [M-H]- | 0.9247 | [268.04, 283.06, 113.02, 459.09, 99.01] |
|  | 67 | 461.1655 | 4.02 | C19H28O10 | 2.2 | Hydrageifolin I | [M+HCOO]- | 0.9672 | [415.16, 269.1, 101.02, 161.04, 113.02] |
|  | 68 | 345.2062 | 11.52 | C21H30O4 | 2.1 | 12-Methoxycarnosic acid | [M-H]- | 0.9919 | [345.21, 301.22, 346.21, 302.22, 299.2] |
|  | 69 | 297.1111 | 8.69 | C18H18O4 | 2 | Enterolactone | [M-H]- | 0.9865 | [297.11, 107.05, 253.12, 189.05, 121.06] |
|  | 70 | 377.0864 | 4.02 | C12H22O11 | 1.9 | Lactulose | [M+Cl]- | 0.9056 | [161.02, 197.04, 135.04, 133.03, 179.03] |
|  | 71 | 339.071 | 5.01 | C15H16O9 | 0.9 | Sinapoyl malate | [M-H]- | 0.9758 | [223.06, 149.02, 164.05, 121.03, 115.0] |

Table S6. Screening and analysis of the therapeutic substance basis of BTHTT.

| Peak number（high content components） | No | m/z | RT min | Formula | ppm | compound name | adduct | score | IL1R1 | IL1R2 | Average binding potential energy |
| --- | --- | --- | --- | --- | --- | --- | --- | --- | --- | --- | --- |
|  | 1 | 447.0922 | 5.7 | C21H18O11 | 0.7 | ***Apigenin 7-glucuronide*** | [M+H]+ | 0.9994 | -8.4 | -9.3 | -9 |
| 16 | 2 | 295.1326 | 14.13 | C19H18O3 | 1.2 | ***Tanshinone IIA*** | [M+H]+ | 0.9951 | -7.1 | -8.8 | -8 |
|  | 3 | 461.1079 | 5.3 | C22H22O11 | 3.1 | ***Diosmetin 7-O-beta-D-glucopyranoside*** | [M-H]- | 0.9004 | -7.7 | -8.2 | -8 |
|  | 4 | 445.0766 | 5.7 | C21H18O11 | 3.2 | ***Baicalin*** | [M-H]- | 0.9848 | -7.4 | -8 | -8 |
|  | 5 | 513.3555 | 12.68 | C30H50O5 | 1.7 | ***Cycloastragenol*** | [M+Na]+ | 0.9997 | -7.3 | -8.1 | -8 |
| 15 | 6 | 297.1482 | 13.3 | C19H20O3 | 0.7 | ***Cryptotanshinone*** | [M+H]+ | 0.9981 | -6.7 | -8.6 | -8 |
|  | 7 | 459.0921 | 5.38 | C22H20O11 | 2.4 | ***Oroxyloside*** | [M-H]- | 0.9247 | -6.9 | -8.4 | -8 |
|  | 8 | 447.129 | 7.72 | C22H22O10 | 1.3 | Sissotrin | [M+H]+ | 0.9991 | -6.6 | -7.7 | -7 |
|  | 9 | 315.2319 | 12.74 | C21H30O2 | 0 | Progesterone | [M+H]+ | 0.9965 | -7.6 | -6.6 | -7 |
|  | 10 | 287.164 | 13.64 | C18H22O3 | 0.5 | 9(11)-Didehydroestriol | [M+H]+ | 0.9467 | -6.6 | -8.3 | -7 |
|  | 11 | 263.0815 | 3.81 | C16H10O2N2 | 0.1 | Indigo | [M+H]+ | 0.9988 | -7 | -7.9 | -7 |
|  | 12 | 285.1487 | 11.54 | C18H22O3 | 3.8 | 16.alpha.-Hydroxyestrone | [M-H]- | 0.9742 | -7.7 | -7.2 | -7 |
|  | 13 | 332.0893 | 8.39 | C20H14NO4 | 5 | Sangrovit | [M]+ | 0.9989 | -5.8 | -9.1 | -7 |
|  | 14 | 294.1488 | 11.05 | C19H19NO2 | 0.7 | Dehydronuciferine | [M+H]+ | 0.9816 | -6.7 | -8.1 | -7 |
|  | 15 | 461.0715 | 5.63 | C21H18O12 | 3.1 | Kaempferol 3-glucuronoside | [M-H]- | 0.9859 | -6.9 | -7.9 | -7 |
|  | 16 | 430.2949 | 11.36 | C26H43NO6 | 0.3 | N-Choloylglycine | [M+H-2H2O]+ | 0.9173 | -7 | -7.8 | -7 |
|  | 17 | 327.1226 | 11.78 | C19H20O6 | 0.5 | 6a,7,8,12a-Tetrahydroxy-3-methyl-2,3,4,5,6,7-hexahydrobenzo[a]anthracene-1,12-dione | [M+H-H2O]+ | 0.9019 | -7.2 | -7.6 | -7 |
|  | 18 | 325.1072 | 11.74 | C19H18O5 | 2.9 | Unguinol | [M-H]- | 0.914 | -6.6 | -8.2 | -7 |
|  | 19 | 281.0443 | 5.53 | C16H10O6 | 0.8 | 3,8-Dihydroxy-1-methylanthraquinone-2-carboxylic acid | [M+H-H2O]+ | 0.9878 | -6.8 | -7.8 | -7 |
|  | 20 | 555.1109 | 5.45 | C25H24O13 | 0.1 | 6'-Malonyltrifolirhizin | [M+Na]+ | 0.9177 | -6.4 | -8.1 | -7 |
|  | 21 | 301.1434 | 10.78 | C18H22O5 | 0.1 | Zearalenone | [M+H-H2O]+ | 0.9261 | -6.6 | -7.9 | -7 |
|  | 22 | 353.1148 | 12.18 | C19H16N2O5 | 4.6 | IOX2 | [M+H]+ | 0.9874 | -6.5 | -7.9 | -7 |
|  | 23 | 299.1277 | 13.71 | C19H20O6 | 0.6 | Teucrin A | [M+H-CH2O2]+ | 0.9571 | -7.1 | -7.3 | -7 |
|  | 24 | 464.3006 | 8.9 | C26H41NO6 | 0.4 | ((R)-4-((3R,5R,6S,7R,8S,9S,10R,13R,14S,17R)-3,6,7-trihydroxy-10,13-dimethylhexadecahydro-1H-cyclopenta[a]phenanthren-17-yl)pent-2-enoyl)glycine | [M+H]+ | 0.9088 | -6.6 | -7.7 | -7 |
| 37 | 25 | 313.1435 | 12.14 | C19H24O5 | 3.3 | Gibberellin A4 | [M-H-H2O]- | 0.8986 | -7.3 | -7 | -7 |
| 7 | 26 | 342.1698 | 3.68 | C20H24NO4+ | 0.9 | Magnoflorine | [M]+ | 0.9349 | -6.5 | -7.7 | -7 |
| 27 | 27 | 493.1125 | 5.87 | C26H22O10 | 3.3 | Salvianolic acid A | [M-H]- | 0.9891 | -6.5 | -7.7 | -7 |
|  | 28 | 253.1586 | 12.18 | C18H22O2 | 0.8 | Estra-4,9-diene-3,17-dione | [M+H-H2O]+ | 0.9092 | -6.6 | -7.5 | -7 |
|  | 29 | 463.1234 | 5.5 | C22H22O11 | 0.4 | Tectoridin | [M+H]+ | 0.9893 | -6.2 | -7.6 | -7 |
|  | 30 | 177.0545 | 6.8 | C16H14O6 | 0.4 | Hesperetin | [M+H-C6H6O3]+ | 0.9736 | -6.2 | -7.4 | -7 |
|  | 31 | 347.1491 | 9.21 | C19H24O6 | 3.2 | Eurycomalactone | [M-H]- | 0.9174 | -6.6 | -7 | -7 |
|  | 32 | 651.2926 | 12.18 | C19H22O4 | 0.8 | Anisocoumarin h | [2M+Na]+ | 0.9854 | -6.1 | -7.4 | -7 |
|  | 33 | 299.0914 | 8.6 | C17H14O5 | 0.4 | 3',4'-Dimethoxyflavonol | [M+H]+ | 0.9571 | -6.2 | -7.2 | -7 |
|  | 34 | 311.1279 | 13.1 | C19H20O4 | 3 | 1-(3,4-Dihydroxyphenyl)-7-(4-hydroxyphenyl)-4-hepten-3-one | [M-H]- | 0.9068 | -6.8 | -6.6 | -7 |
|  | 35 | 369.2785 | 13.26 | C25H42O5 | 0.7 | Cholic acid methyl ester | [M+H-3H2O]+ | 0.9754 | -6.3 | -7 | -7 |
|  | 36 | 135.044 | 5.33 | C14H12N2O5 | 0.6 | N-(2-Hydroxy-4-nitrophenyl)-4-methoxybenzamide | [M+H-C6H6N2O3]+ | 0.9513 | -6.4 | -6.9 | -7 |
|  | 37 | 347.1854 | 9.7 | C20H28O5 | 3.3 | Gibberellin A14 | [M-H]- | 0.9331 | -6.4 | -6.9 | -7 |
|  | 38 | 229.0859 | 9.83 | C16H16O5 | 0.8 | (.+/-.)-Columbianetin acetate | [M+H-C2H4O2]+ | 0.9313 | -6.3 | -6.9 | -7 |
|  | 39 | 419.1829 | 13.02 | C24H28O5 | 1.5 | 2',4,4',6'-Tetramethylether-3'-prenylchalcone | [M+Na]+ | 0.9516 | -6.5 | -6.7 | -7 |
|  | 40 | 285.076 | 7.29 | C16H14O5 | 2.9 | Homobutein | [M-H]- | 0.9368 | -6.5 | -6.7 | -7 |
|  | 41 | 317.102 | 7.41 | C17H16O6 | 0.7 | Byakangelicol | [M+H]+ | 0.9593 | -6.3 | -6.8 | -7 |
|  | 42 | 297.1122 | 13.66 | C18H18O4 | 3.5 | 4',6'-Dimethoxy-2'-hydroxy-4-methylchalcone | [M-H]- | 0.926 | -6.1 | -6.8 | -6 |
|  | 43 | 345.2062 | 11.52 | C21H30O4 | 2.1 | 12-Methoxycarnosic acid | [M-H]- | 0.9919 | -5.8 | -7 | -6 |
|  | 44 | 325.092 | 3.52 | C15H18O8 | 3.3 | 4-O-D-Glucopyranosyl-p-coumaric acid | [M-H]- | 0.9985 | -5.9 | -6.9 | -6 |
|  | 45 | 265.1436 | 11.64 | C15H22O4 | 3.3 | Dendocarbin M | [M-H]- | 0.9764 | -6.1 | -6.6 | -6 |
|  | 46 | 334.1649 | 1.59 | C18H23NO5 | 0.5 | Seneciphylline | [M+H]+ | 0.9695 | -6.6 | -6.1 | -6 |
|  | 47 | 313.1072 | 7.91 | C18H18O5 | 2.6 | 2'-Hydroxy-3,4,6'-trimethoxychalcone | [M-H]- | 0.9355 | -5.7 | -6.9 | -6 |
|  | 48 | 297.1111 | 8.69 | C18H18O4 | 2 | Enterolactone | [M-H]- | 0.9865 | -6 | -6.6 | -6 |
|  | 49 | 120.0809 | 2.97 | C18H20N2O3 | 0.4 | Phenylalanylphenylalanine | [M+H-C10H11NO3]+ | 0.9795 | -5.5 | -6.9 | -6 |
|  | 50 | 331.1905 | 12.14 | C20H28O4 | 3.2 | Hautriwaic acid | [M-H]- | 0.958 | -5.8 | -6.6 | -6 |
|  | 51 | 251.0586 | 5.28 | C13H10N4O2S | 4.1 | 1,2-Benzenediol, 4-[2-(2-pyrimidinylamino)-4-thiazolyl]- | [M-H-H2S]- | 0.9375 | -6.1 | -6.3 | -6 |
|  | 52 | 339.071 | 5.01 | C15H16O9 | 0.9 | Sinapoyl malate | [M-H]- | 0.9758 | -5.6 | -6.6 | -6 |
|  | 53 | 313.1433 | 12.77 | C19H22O4 | 2.8 | Platyphyllonol | [M-H]- | 0.9223 | -5 | -6.7 | -6 |
|  | 54 | 247.133 | 12.33 | C15H20O3 | 4.6 | Rupestonic acid | [M-H]- | 0.9929 | -5.7 | -6 | -6 |
|  | 55 | 247.133 | 11.61 | C15H22O4 | 4.9 | Sydonic acid | [M-H-H2O]- | 0.9315 | -5.4 | -5.7 | -6 |
|  | 56 | 131.0492 | 4.67 | C9H10O3 | 0.7 | Caffeic alcohol | [M+H-2H2O]+ | 0.9989 | -5.5 | -5.6 | -6 |
|  | 57 | 377.0864 | 4.02 | C12H22O11 | 1.9 | Lactulose | [M+Cl]- | 0.9056 | -5.7 | -5.2 | -5 |
|  | 58 | 357.1081 | 3.89 | C9H9NO3 | 2.8 | Hippuric acid | [2M-H]- | 0.9986 | -5 | -5.8 | -5 |
|  | 59 | 329.087 | 2.5 | C14H18O9 | 2.6 | 4-(Hexopyranosyloxy)-3-methoxybenzoic acid | [M-H]- | 0.9645 | -5.1 | -5.7 | -5 |
|  | 60 | 397.1126 | 6.63 | C7H9N3O4 | 2.5 | (.+/-.)-Willardiine | [2M-H]- | 0.9903 | -5.3 | -5.5 | -5 |
| 1 | 61 | 144.0477 | 2.04 | C12H17N4OS | 1.6 | vitamin B1 | [Cat-C6H7N3]+ | 0.9665 | -4.9 | -5.7 | -5 |
|  | 62 | 225.0983 | 0.69 | C9H14N4O3 | 2.5 | Carnosine | [M-H]- | 0.9731 | -4.8 | -5.8 | -5 |
| 22 | 63 | 167.0335 | 4.07 | C8H8O4 | 9.4 | 3,4-Dihydroxyphenylacetic acid | [M-H]- | 0.9994 | -5 | -5.3 | -5 |
|  | 64 | 437.142 | 5.12 | C19H26O10 | 1.2 | Benzyl 6-O-(4-carboxy-3-hydroxy-3-methylbutanoyl)hexopyranoside | [M+Na]+ | 0.9981 | -4.9 | -5.3 | -5 |
|  | 65 | 207.0651 | 5.21 | C13H16O5 | 0.1 | Ethyl (2E)-3-(4-hydroxy-3,5-dimethoxyphenyl)-2-propenoate | [M+H-C2H6O]+ | 0.9547 | -4.9 | -5.2 | -5 |
|  | 66 | 340.3575 | 14.52 | C22H45NO | 0.3 | Behenamide | [M+H]+ | 0.9832 | -4.8 | -5.1 | -5 |
|  | 67 | 260.197 | 1.43 | C12H25N3O3 | 0.7 | Lys-Ile | [M+H]+ | 0.943 | -4.9 | -4.7 | -5 |
|  | 68 | 338.3416 | 17.23 | C22H43NO | 0.3 | Erucamide | [M+H]+ | 0.9612 | -4.5 | -5.1 | -5 |
|  | 69 | 144.0654 | 1.91 | C6H9NO3 | 0 | (2R)-6-Ketopipecolinic acid | [M+H]+ | 0.9703 | -4.4 | -4.5 | -4 |
|  | 70 | 461.1655 | 4.02 | C19H28O10 | 2.2 | Hydrageifolin I | [M+HCOO]- | 0.9672 | -4.5 | -4.2 | -4 |
|  | 71 | 176.0198 | 5.05 | C6H9NOS2 | 0.3 | (-)-Sulforaphene | [M+H]+ | 0.955 | -3.2 | -3.3 | -3 |
